# Supplementary material
Source: publisher site journal article supplement (https://www.dovepress.com/article/590436)
Supplement: Supplementary file 1 [file 590436%20Supplementary.docx]

# **
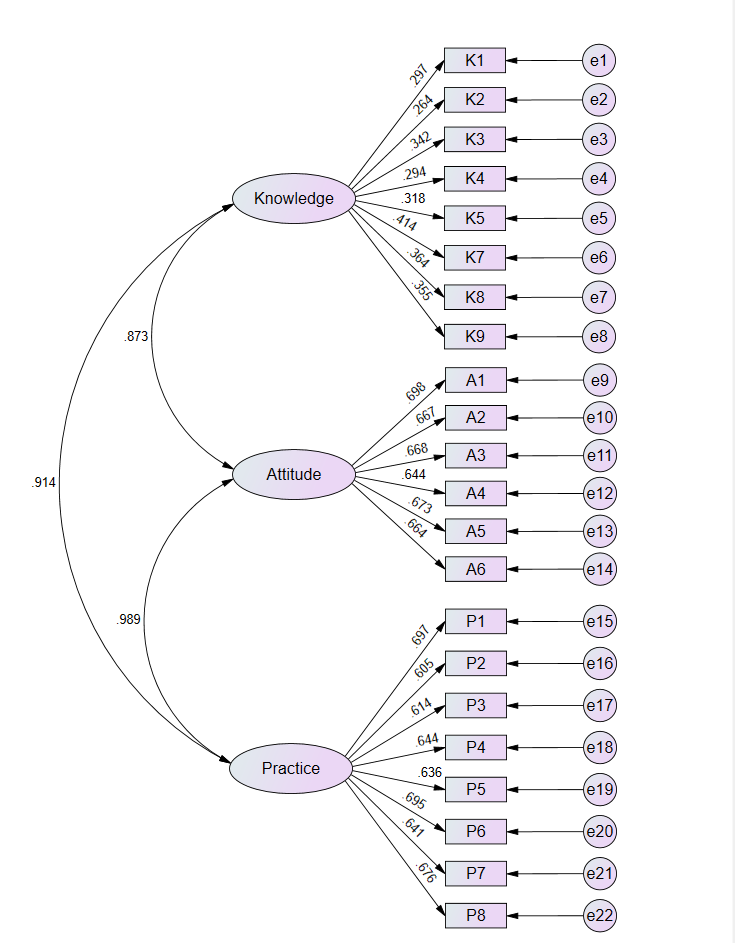
**

# **Supplementary Figure 1. Measurement Model of the Confirmatory Factor Analysis.**

K6 was an attention-check item and was therefore not included in the CFA measurement model.

**Supplementary Table 1.** Model Fit Indices of the Confirmatory Factor Analysis (CFA).

| Indicators | Reference | Actual |
| --- | --- | --- |
| CMIN/DF | 1-3: Excellent, 3-5: Good | 1.223 |
| RMSEA | <0.08: Good | 0.021 |
| IFI | >0.9: Good | 0.986 |
| TLI | >0.9: Good | 0.984 |
| CFI | >0.9: Good | 0.986 |

**Supplementary Table 2**. Standardized and Unstandardized Estimates of the CFA Model.

|  |  |  | **Estimate** | **Standardized Estimate** | **S.E.** | **C.R.** | **P** |
| --- | --- | --- | --- | --- | --- | --- | --- |
| K1 | <--- | Knowledge | 1.000 | 0.297 |  |  |  |
| K2 | <--- | Knowledge | 0.887 | 0.264 | 0.215 | 4.130 | <0.001 |
| K3 | <--- | Knowledge | 1.190 | 0.342 | 0.251 | 4.741 | <0.001 |
| K4 | <--- | Knowledge | 1.029 | 0.294 | 0.234 | 4.389 | <0.001 |
| K5 | <--- | Knowledge | 1.067 | 0.318 | 0.233 | 4.579 | <0.001 |
| K7 | <--- | Knowledge | 1.510 | 0.414 | 0.293 | 5.146 | <0.001 |
| K8 | <--- | Knowledge | 1.219 | 0.364 | 0.250 | 4.879 | <0.001 |
| K9 | <--- | Knowledge | 1.196 | 0.355 | 0.248 | 4.829 | <0.001 |
| A1 | <--- | Attitude | 1.000 | 0.698 |  |  |  |
| A2 | <--- | Attitude | 0.939 | 0.667 | 0.066 | 14.119 | <0.001 |
| A3 | <--- | Attitude | 0.930 | 0.668 | 0.066 | 14.144 | <0.001 |
| A4 | <--- | Attitude | 0.925 | 0.644 | 0.068 | 13.645 | <0.001 |
| A5 | <--- | Attitude | 0.911 | 0.673 | 0.064 | 14.238 | <0.001 |
| A6 | <--- | Attitude | 0.884 | 0.664 | 0.063 | 14.049 | <0.001 |
| P1 | <--- | Practice | 1.000 | 0.697 |  |  |  |
| P2 | <--- | Practice | 0.923 | 0.605 | 0.072 | 12.895 | <0.001 |
| P3 | <--- | Practice | 0.906 | 0.614 | 0.069 | 13.076 | <0.001 |
| P4 | <--- | Practice | 0.980 | 0.644 | 0.072 | 13.702 | <0.001 |
| P5 | <--- | Practice | 0.943 | 0.636 | 0.070 | 13.533 | <0.001 |
| P6 | <--- | Practice | 1.030 | 0.695 | 0.070 | 14.721 | <0.001 |
| P7 | <--- | Practice | 0.931 | 0.641 | 0.068 | 13.638 | <0.001 |
| P8 | <--- | Practice | 1.004 | 0.676 | 0.070 | 14.353 | <0.001 |

**Supplementary Table 3. Comparison of Demographics and KAP Scores based on PCSK9 Inhibitor Research Participation.**

| **Demographics & KAP** | **Had taken part in PCSK9i research** | | **P*** |
| --- | --- | --- | --- |
| **Yes (N=340)** | **No (N=172)** |
| **Knowledge** | 10.02±2.58 | 10.10±2.69 | 0.799 |
| **Attitude** | 23.79±4.99 | 23.74±5.13 | 0.858 |
| **Practice** | 31.61±6.34 | 31.91±6.52 | 0.484 |
| **Respondent Gender** |  |  | 0.540 |
| Male | 130 (38.24) | 61 (35.47) |  |
| Female | 210 (61.76) | 111 (64.53) |  |
| **Age** |  |  | 0.190 |
| ≤ 32 years | 195 (57.35) | 109 (63.37) |  |
| >32 years | 145 (42.65) | 63 (36.63) |  |
| **Education Level** |  |  | 0.535 |
| Bachelor's degree or below | 122 (35.88) | 62 (36.05) |  |
| Master’s degree | 158 (46.47) | 86 (50.00) |  |
| Doctoral degree | 60 (17.65) | 24 (13.95) |  |
| **Professional Title** |  |  | 0.008 |
| Junior | 16 (4.71) | 20 (11.63) |  |
| Intermediate | 131 (38.53) | 58 (33.72) |  |
| Associate Senior | 139 (40.88) | 63 (36.63) |  |
| Senior | 44 (12.94) | 19 (11.05) |  |
| No professional title | 10 (2.94) | 12 (6.98) |  |
| **Department** |  |  | 0.864 |
| Neurology | 137 (40.29) | 67 (38.95) |  |
| Cardiology | 108 (31.76) | 53 (30.81) |  |
| General Practice | 95 (27.94) | 52 (30.23) |  |
| **Position** |  |  | 0.345 |
| Physician | 135 (39.71) | 82 (47.67) |  |
| Nurse | 108 (31.76) | 44 (25.58) |  |
| Technician | 31 (9.12) | 15 (8.72) |  |
| Pharmacist | 66 (19.41) | 31 (18.02) |  |
| **Years in Practice** |  |  | 0.139 |
| Less than 1 year | 59 (17.35) | 39 (22.67) |  |
| 1-5 years | 136 (40.00) | 74 (43.02) |  |
| More than 6 years | 145 (42.65) | 59 (34.30) |  |
| **Hospital Classification** |  |  | 0.091 |
| Primary-level public hospital | 82 (24.12) | 38 (22.09) |  |
| Secondary-level public hospital | 100 (29.41) | 48 (27.91) |  |
| Tertiary-level public hospital | 64 (18.82) | 50 (29.07) |  |
| Specialized hospital | 34 (10.00) | 15 (8.72) |  |
| Private medical institution | 60 (17.65) | 21 (12.21) |  |

*: The Independent-Samples Mann-Whitney U Test was used for comparisons of continuous variables, and the Pearson Chi-Square Test was used for comparisons of categorical variables

# **Supplementary Table 4. Distribution Across Domains**

| **Knowledge** | | | **N (%)** | | | | | | | | | |
| --- | --- | --- | --- | --- | --- | --- | --- | --- | --- | --- | --- | --- |
| **Very familiar** | | | **Heard of** | | | | **Unfamiliar** | | |
| 1. PCSK9, or proprotein convertase subtilisin/kexin type 9, also known as neural apoptosis-regulated convertase-1, is a secreted soluble serine protease composed of 692 amino acids with a molecular weight of 72 kDa. | | | 193 (37.7) | | | 247 (48.24) | | | | 72 (14.06) | | |
| 1. Current PCSK9 inhibitors primarily include monoclonal antibodies (e.g., evolocumab, alirocumab) and RNA interference-based agents (e.g., inclisiran). | | | 201 (39.26) | | | 242 (47.27) | | | | 69 (13.48) | | |
| 1. When LDL-C levels remain above target after statin therapy, combination treatment with a PCSK9 inhibitor (or a cholesterol absorption inhibitor) should be considered. | | | 228 (44.53) | | | 211 (41.21) | | | | 73 (14.26) | | |
| 1. PCSK9 inhibitors are mainly indicated for three groups: patients at very high cardiovascular risk, patients with familial hypercholesterolemia (FH) without established atherosclerotic cardiovascular disease (ASCVD), and patients from either category who are intolerant to statins. | | | 223 (43.55) | | | 213 (41.6) | | | | 76 (14.84) | | |
| 1. Mechanism of action: PCSK9 is a liver-derived, secreted serine protease that binds to LDL receptors (LDLR) and promotes their degradation, thereby reducing the clearance of LDL-C from the circulation. Inhibition of PCSK9 prevents LDLR degradation and enhances LDL-C clearance. The mechanism of action of PCSK9 monoclonal antibodies involves direct targeting of the PCSK9 protein. | | | 206 (40.23) | | | 239 (46.68) | | | | 67 (13.09) | | |
| 1. The capital of China is Shanghai. | | |  | | |  | | | |  | | |
| 1. PCSK9 inhibitors, when added to statin therapy, further reduce the incidence of major adverse cardiovascular events, reinforcing the concept that more intensive LDL-C lowering confers additional cardiovascular protection. | | | 192 (37.5) | | | 218 (42.58) | | | | 102 (19.92) | | |
| 1. PCSK9 inhibitors are covered under the national health insurance reimbursement system. | | | 205 (40.04) | | | 240 (46.88) | | | | 67 (13.09) | | |
| 1. PCSK9 inhibitors may have additional effects, including anti-inflammatory activity, antiplatelet effects, and stabilization of atherosclerotic plaques. | | | 197 (38.48) | | | 244 (47.66) | | | | 71 (13.87) | | |
| **Attitude** | | | | | **N (%)** | | | | | | | | | | |
| **Strongly agree** | | **Agree** | | **Neutral** | | | **Disagree** | | **Strongly Disagree** | |
| 1. I believe the safety profile of PCSK9 inhibitors is trustworthy. | | | | | 221 (43.16) | | 146 (28.52) | | 80 (15.63) | | | 36 (7.03) | | 29 (5.66) | |
| 1. I believe PCSK9 inhibitors are effective in treating hypercholesterolemia and preventing cardiovascular events. | | | | | 206 (40.23) | | 161 (31.45) | | 86 (16.8) | | | 28 (5.47) | | 31 (6.05) | |
| 1. I believe PCSK9 inhibitors will become a primary therapeutic option for hypercholesterolemia in the future. | | | | | 207 (40.43) | | 166 (32.42) | | 82 (16.02) | | | 27 (5.27) | | 30 (5.86) | |
| 1. I believe the current use of PCSK9 inhibitors is subject to controversy and should be approached with caution. | | | | | 209 (40.82) | | 151 (29.49) | | 88 (17.19) | | | 32 (6.25) | | 32 (6.25) | |
| 1. I believe existing clinical guidelines on the use of PCSK9 inhibitors require further clarification. | | | | | 186 (36.33) | | 192 (37.5) | | 78 (15.23) | | | 27 (5.27) | | 29 (5.66) | |
| 1. I support broader implementation of PCSK9 inhibitors in current clinical practice. | | | | | 223 (43.55) | | 158 (30.86) | | 87 (16.99) | | | 19 (3.71) | | 25 (4.88) | |
|  | | | | | **High cost** | | **Inconvenience of scheduled injections** | | **Elevated risk of adverse effects** | | | **Lack of long-term supporting data** | |  | |
| 1. In your opinion, what are the main challenges associated with the clinical use of PCSK9 inhibitors? (Select all that apply) | | | | | 312 (60.94) | | 259 (50.59) | | 242 (47.27) | | | 199 (38.87) | |  | |
|  | | | | | **Clinical guidelines and consensus recommendations** | | **Patient’s cholesterol level** | | **Patient’s cardiovascular risk** | | | **Scope of medical insurance coverage** | | **Patient’s financial status** | |
| 8. In your opinion, which factors should influence the clinical application of PCSK9 inhibitors? (Select all that apply) | | | | | 308 (60.16) | | 187 (36.52) | | 248 (48.44) | | | 149 (29.1) | | 158 (30.86) | |
| **Practice** | **N (%)** | | | | | | | | | | | | | |
| **Always** | **Often** | | **Sometimes** | | | | **Rarely** | | | **Never** | | | |
| 1. I conduct a thorough assessment before initiating PCSK9 inhibitor therapy in patients. | 205 (40.04) | 174 (33.98) | | 81 (15.82) | | | | 27 (5.27) | | | 25 (4.88) | | | |
| 1. I engage in multidisciplinary discussions and consultations before initiating PCSK9 inhibitor therapy. | 213 (41.6) | 152 (29.69) | | 83 (16.21) | | | | 34 (6.64) | | | 30 (5.86) | | | |
| 1. I perform regular evaluations of treatment efficacy and safety in patients receiving PCSK9 inhibitors. | 195 (38.09) | 158 (30.86) | | 104 (20.31) | | | | 27 (5.27) | | | 28 (5.47) | | | |
| 1. I routinely monitor cholesterol levels in patients treated with PCSK9 inhibitors. | 217 (42.38) | 137 (26.76) | | 104 (20.31) | | | | 22 (4.3) | | | 32 (6.25) | | | |
| 1. I monitor the incidence of cardiovascular events in patients receiving PCSK9 inhibitors. | 199 (38.87) | 162 (31.64) | | 95 (18.55) | | | | 27 (5.27) | | | 29 (5.66) | | | |
| 1. I closely observe potential adverse effects associated with PCSK9 inhibitors and respond proactively. | 240 (46.88) | 139 (27.15) | | 78 (15.23) | | | | 30 (5.86) | | | 25 (4.88) | | | |
| 1. I schedule regular follow-up visits for patients receiving PCSK9 inhibitor therapy. | 216 (42.19) | 144 (28.13) | | 100 (19.53) | | | | 30 (5.86) | | | 22 (4.3) | | | |
| 1. I stay up to date with clinical guidelines and literature related to PCSK9 inhibitors. | 206 (40.23) | 167 (32.62) | | 76 (14.84) | | | | 37 (7.23) | | | 26 (5.08) | | | |
|  | **Patient’s cholesterol level** | **Patient’s cardiovascular risk** | | **Tolerability and efficacy of other lipid-lowering therapies** | | | | **Patient’s age and sex** | | |  | | | |
| 1. What factors do you consider when formulating a treatment plan involving PCSK9 inhibitors? (Select all that apply) | 233 (45.51) | 243 (47.46) | | 275 (53.71) | | | | 300 (58.59) | | |  | | | |

Note: To ensure data quality, an attention-check item (K6, "The capital of China is Shanghai") was embedded within knowledge domain; responses to this item were strictly used for data screening and were excluded from the final knowledge score calculation.

# **Supplementary Table 5. Model fit of Structural Equation Model**

| **Model Fit Indices** | **Ref.** | **Measured results** |
| --- | --- | --- |
| **CMIN/DF** | 1-3 excellent, 3-5 good | 1.223 |
| **RMSEA** | <0.08 good | 0.021 |
| **IFI** | >0.8 good | 0.986 |
| **TLI** | >0.8 good | 0.984 |
| **CFI** | >0.8 good | 0.986 |
